# Supplementary material for: The Development of DNA Based Methods for the Reliable and Efficient Identification ofNicotiana tabacumin Tobacco and Its Derived Products
Source: Hindawi journal article supplement (doi:10.1155/2016/4352308), 2016-01-01
Supplement: f1 [file 4352308.f1.pdf]

## Supplementary materials

### Supplementary figures

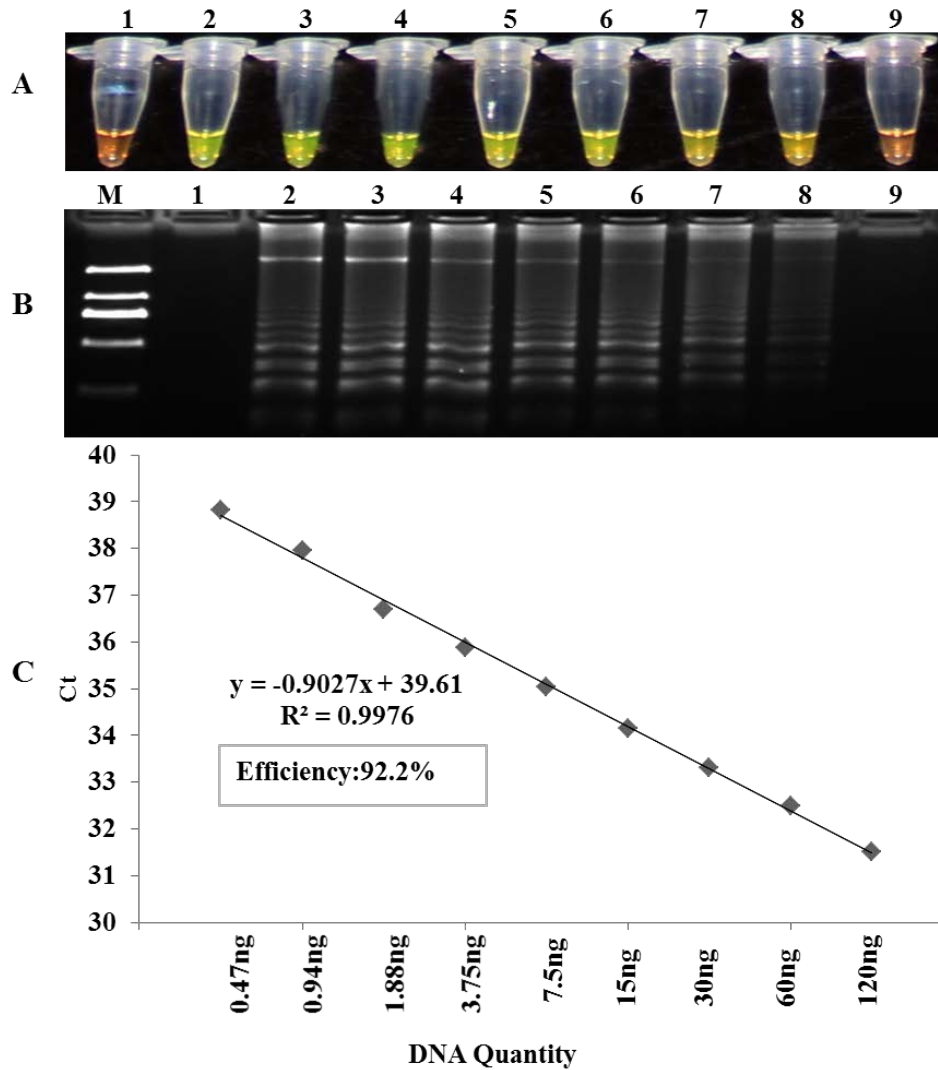

FIGURE S1: Sensitivity test of UMPS gene using serial dilutions of genomic DNA from reconstituted tobacco samples. (A) LAMP method through direct visual detection with SYBR Green I; (B) LAMP method on 2% agarose gel electrophoresis analysis. Lane 1, NTC; lanes 2-9, 120, 60, 30, 15, 7.5, 3.75, 1.88 and 0.94 ng per reaction, respectively; lane M, Trans 2K DNA marker. (C) qPCR method. For standard curve, a serial dilution of DNA samples (120, 60, 30, 15, 7.5, 3.75, 1.88, 0.94, 0.47, 0.24, 0.12 and 0.06 ng per reaction) was used. The result was developed after considering 3 independent experiments with three replications.

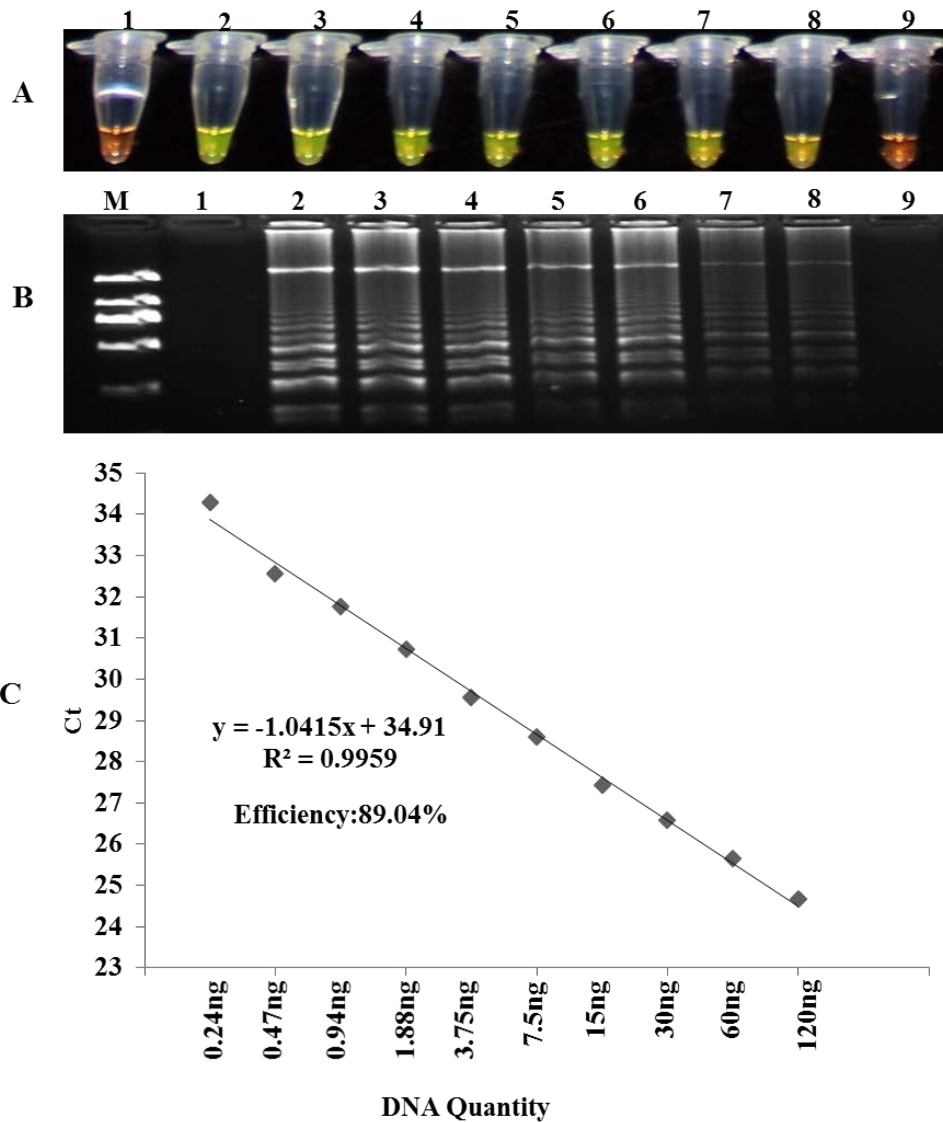

FIGURE S2: Sensitivity test of UMPS gene using serial dilutions of genomic DNA of unprocessed tobacco samples. (A) LAMP method through direct visual detection with SYBR Green I; (B) LAMP method on 2% agarose gel electrophoresis analysis. *Lane 1*, NTC; *lanes 2-9*, 120, 60, 30, 15, 7.5, 3.75, 1.88 and 0.94 ng per reaction, respectively; *lane M*, Trans 2K DNA marker. (C) qPCR method. For standard curve, a serial dilution of DNA samples (120, 60, 30, 15, 7.5, 3.75, 1.88, 0.94, 0.47, 0.24, 0.12 and 0.06 ng per reaction) was used. The result was developed after considering 3 independent experiments with three replications.

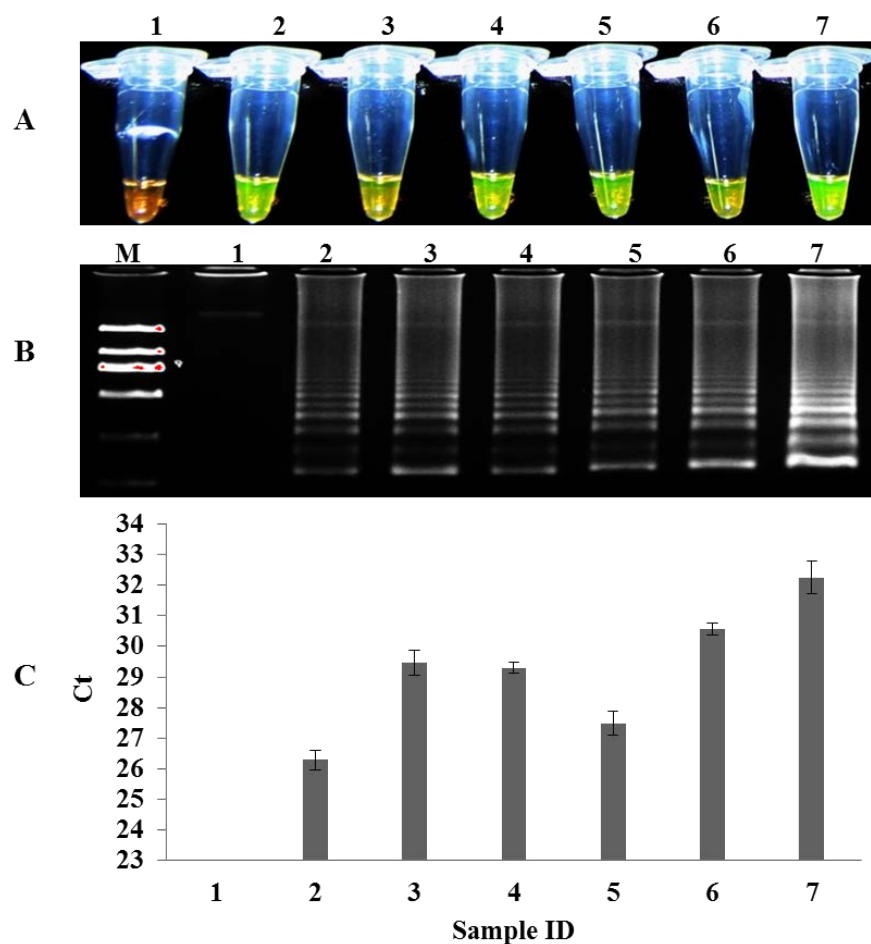

FIGURE S3: Detection of tobacco components in practical samples. (A) LAMP method through direct visual detection with SYBR Green I; (B) LAMP method on 2% agarose gel electrophoresis analysis; (C) qPCR method. *Lane 1*, NTC; *lane 2*, PTC; *lanes 3-7*, different cigarette brands like liqun, double happiness, mevius, marlboro and wuyeshen; *lane M*, Trans 2K DNA marker. Ct was expressed as mean Ct  $\pm$ SD from 3 independent experiments with three replications.

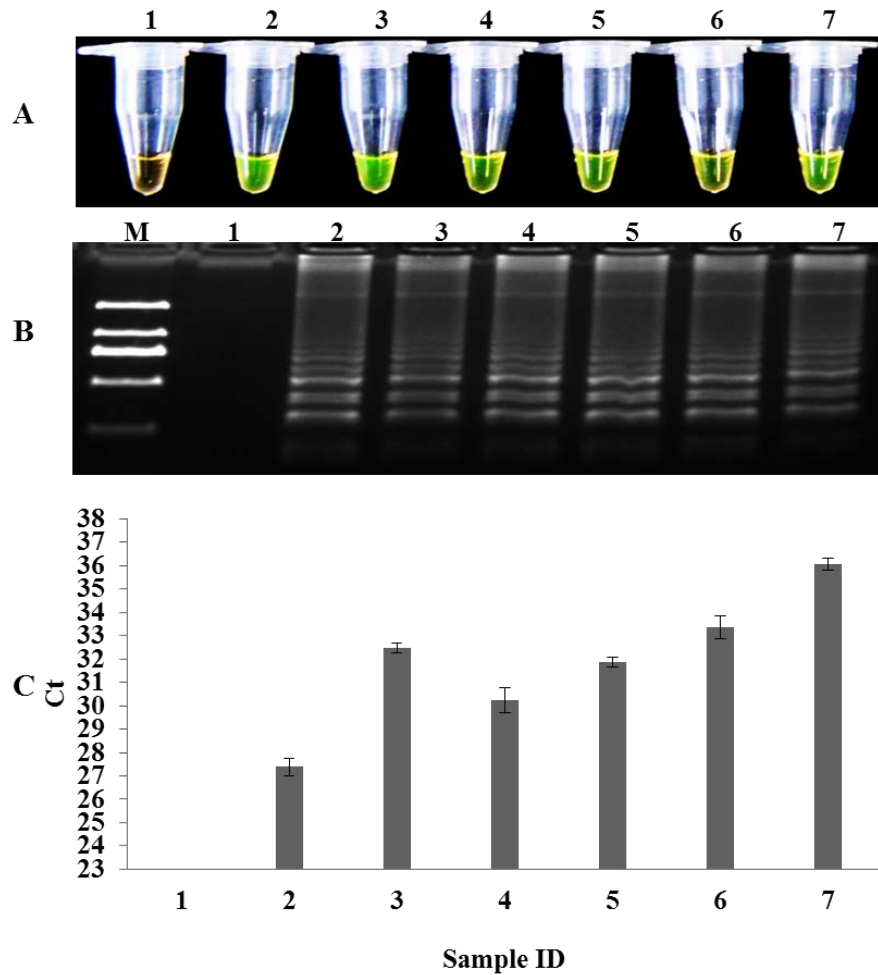

FIGURE S4: Detection of tobacco components in reconstituted tobacco samples. (A) LAMP method through direct visual detection with SYBR Green I; (B) LAMP method on 2% agarose gel electrophoresis analysis; (C) qPCR detection. *Lane 1*, NTC; *lane 2* PTC; *lanes 2-6*, different reconstituted tobacco samples, *lane 7*, tobacco stems sample; *lane M*, Trans 2K DNA marker. Ct was expressed as mean Ct  $\pm$  SD from 3 independent experiments with three replications.

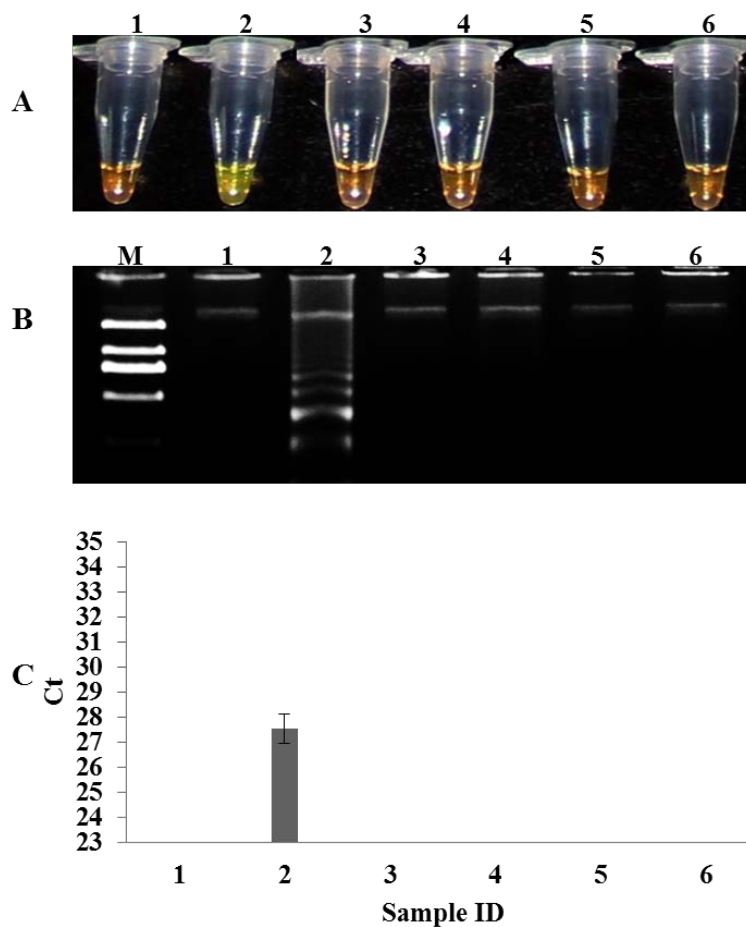

FIGURE S5: Detection of tobacco components in cigarette white wrapper. (A) LAMP method through direct visual detection with SYBR Green I; (B) LAMP method on 2% agarose gel electrophoresis analysis; (C) qPCR detection. *Lane 1*, NTC; *lane 2*, PTC; *lanes 3-6*, Cigarettes wrappers from Liqun, Double happiness, Mevius and Marlboro, respectively; *lane M*, Trans 2K DNA marker. Ct was expressed as mean Ct  $\pm$ SD from 3 independent experiments with three replications.

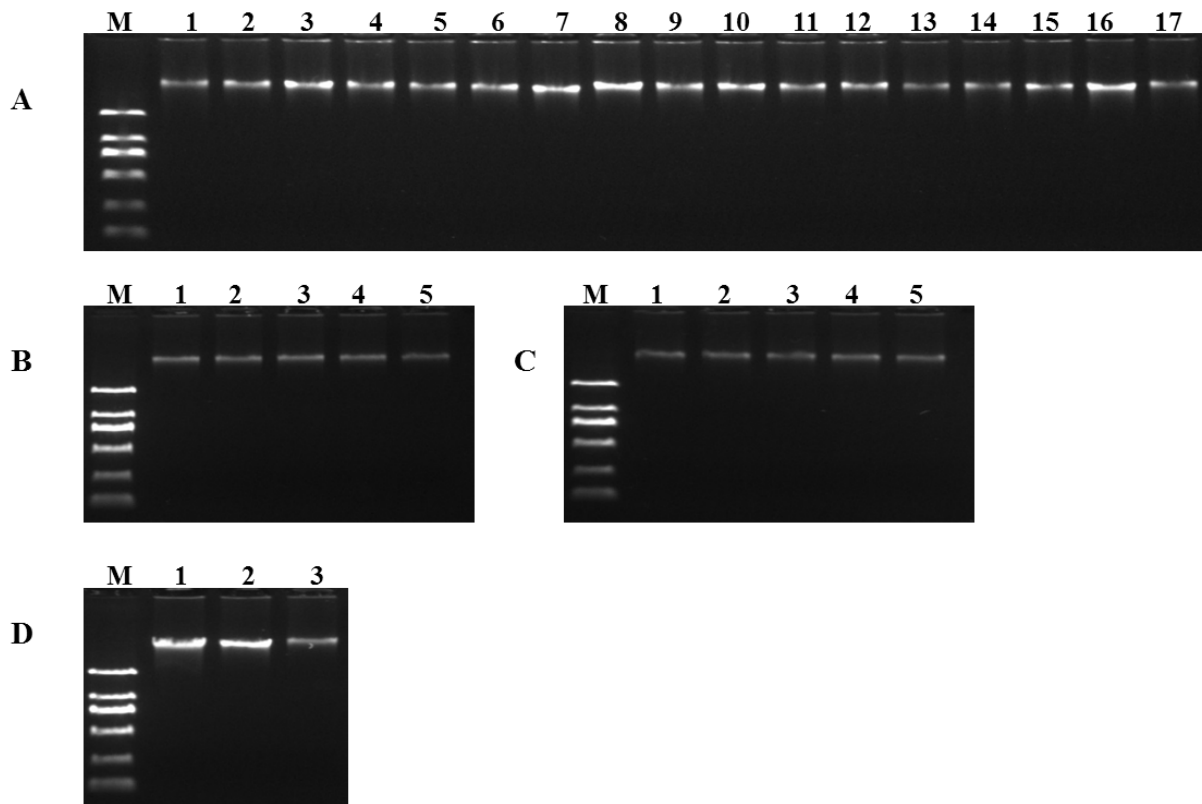

FIGURE S6: Qualities evaluation of extracted genomic DNA on 1% (w/v) agarose gel electrophoresis in 0.5×TBE with GelRed staining. (A) Different tobacco samples received from Bulgarian customs. (B) Different cigarette samples purchased from locally. (C) Different reconstituted tobacco samples received from Netherlands and Bulgarian customs. (D) Different tobacco samples (fresh leaves, dried leaves and reconstituted tobacco) used for determination of the LOD.

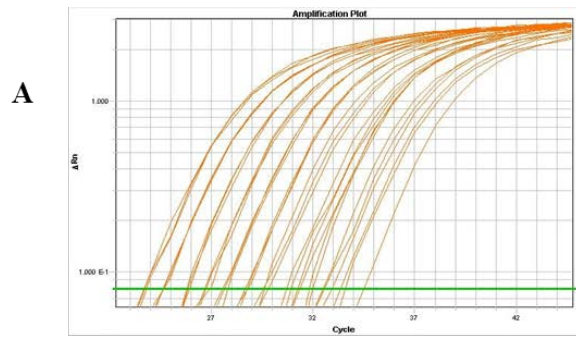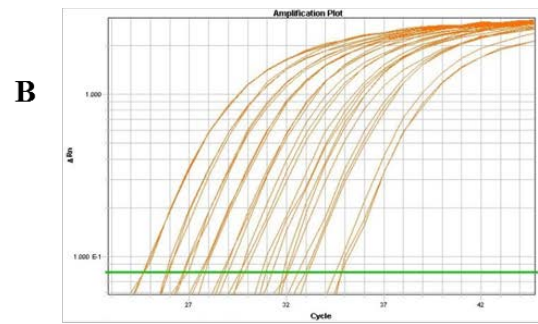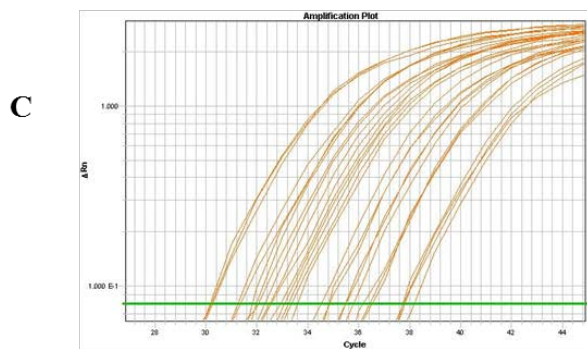

FIGURE S7: Amplification plots of qPCR used DNA from different tobacco samples. (A) Fresh tobacco leaves. (B) Unprocessed tobacco leaves. (C) Reconstituted tobacco samples.

## Supplementary tables

**TABLE S1: List of oligonucleotide primers and probes used in this study**

| PCR type      | Primer/probe name | Sequence (5'----3')                          | Amplicon size |
|---------------|-------------------|----------------------------------------------|---------------|
| Real-time PCR | Q-UMPS-F          | TGCAAGAAGAATGTGATAGTAAGTG                    | 82 bp         |
|               | Q-UMPS-R          | ACTCCAACCTTCTACAAGCTATCC                     |               |
|               | Q-UMPS-P          | CAGCTGTGTAGGGTATAGTGCATTT                    |               |
| LAMP          | UMPS-F3           | TCACAAGGTTTGTAGAGACTT                        | 222 bp        |
|               | UMPS-B3           | CACACAAACATAAATCATTGGAC                      |               |
|               | UMPS-FIP          | ACTTTGATACCTTTGTAAAGCCCCACCTTGTCTTTGGGTGTCG  |               |
|               | UMPS-BIP          | ATGAATTGTCCTAACCTCCTTTGTAAAGTAGGAAATGTCGCCTG |               |



**TABLE S2: Description of different tobacco samples received from Bulgarian Customs.**

| Sample ID | Type/sort of tobacco acc. documents by import | Country of origin | Type of Curing          |
|-----------|-----------------------------------------------|-------------------|-------------------------|
| 01_2014   | Burley                                        | India             | light air-cured         |
| 02_2014   | Oriental SAADI-6                              | Lebanon           | sun cured Oriental type |
| 03_2014   | Virginia                                      | India             | flue-cured              |
| 04_2014   | Burley                                        | India             | light air-cured         |
| 05_2014   | Virginia                                      | India             | flue-cured              |
| 06_2014   | Burley                                        | Serbia            | light air-cured         |
| 07_2014   | Oriental                                      | Bulgaria          | sun cured Oriental type |
| 08_2014   | Oriental                                      | Bulgaria          | sun cured Oriental type |
| 09_2014   | Oriental                                      | Bulgaria          | sun cured Oriental type |
| 10_2014   | Oriental                                      | Bulgaria          | sun cured Oriental type |
| 11_2014   | Oriental                                      | Bulgaria          | sun cured Oriental type |
| 12_2014   | Reconstituted tobacco foil                    | unknown           | n.a.                    |
| 13_2014   | Virginia grade A                              | India             | flue-cured              |
| 14_2014   | Virginia grade B                              | India             | flue-cured              |
| 15_2014   | Oriental BASMAK                               | India             | sun cured Oriental type |

**TABLE S3: Description of reconstituted tobacco samples received from Netherlands and Bulgarian Customs.**

| Sample ID | Descriptions of reconstituted tobacco                                          |
|-----------|--------------------------------------------------------------------------------|
| Sample 1  | Reconstituted tobacco, factory sample: tobacco stems, no sulphate cellulose    |
| Sample 2  | Reconstituted tobacco, factory sample: no tobacco stems, no sulphate cellulose |
| Sample 3  | Reconstituted tobacco, factory sample: tobacco stems, with sulphate cellulose  |
| Sample 4  | Reconstituted tobacco: commercial wrapper                                      |
| Sample 5  | Tobacco Stems (Bulgarian Customs)                                              |
